# Supplementary material for: Patterning at the 10 nanometer length scale using a strongly segregating block copolymer thin film and vapor phase infiltration of inorganic precursors
Source: Royal Society of Chemistry journal article supplement (doi:10.1039/c6nr01409g), 2016-01-01
Supplement: c6nr01409g1.pdf [file c6nr01409g1.pdf]

## Supporting Information

1

2

### 3 Patterning at the 10 Nanometer Length Scale using a 4 Strongly Segregating Block Copolymer Thin Film 5 and Vapor Phase Infiltration of Inorganic Precursors.

6

7 *Jonathan W. Choi*<sup>1</sup>, *Zhaodong Li*<sup>1</sup>, *Charles T. Black*<sup>2</sup>, *Daniel P. Sweat*<sup>3</sup>, *Xudong Wang*<sup>1</sup>,  
8 *and Padma Gopalan*<sup>1\*</sup>

9

10 <sup>1</sup>Department of Materials Science and Engineering, University of Wisconsin-Madison,  
11 Wisconsin 53706

12 <sup>2</sup>Center for Functional Nanomaterials, Brookhaven National Laboratory, New York 11973

13 <sup>3</sup>Department of Chemistry, University of Wisconsin-Madison, Wisconsin 53706

14

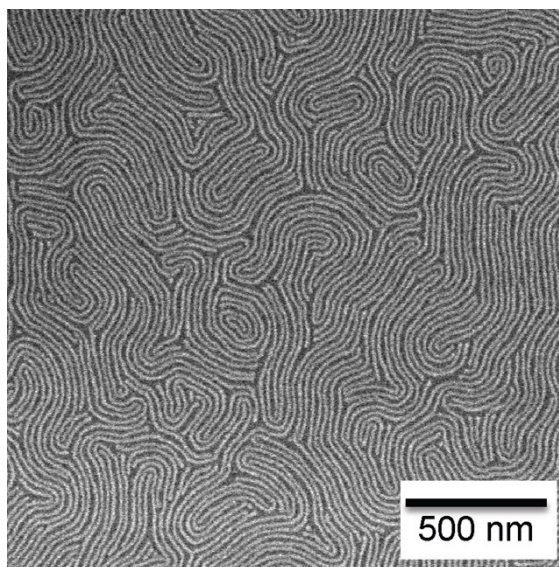

15

16 Figure S1. Low magnification SEM image of the ALO nanowires showing no island/hole  
17 structures.

18

19

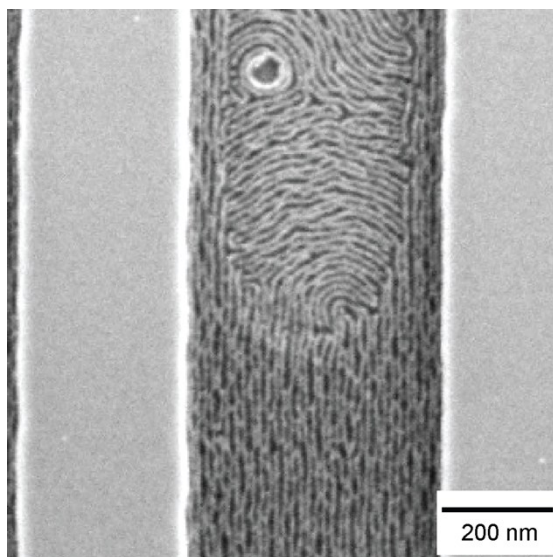

1

2 Figure S2. SEM image of P(tBS-*b*-2VP) (mol wt. 6.1K-1.6K) in a 410 nm rectangular  
3 shaped trench showing a change in microdomain alignment. This can be explained by the  
4 thickness of the film being one monolayer in the top portion then a region of bilayer of  
5 cylinders in the bottom half. This is consistent with the report by Hammond et al. and  
6 Mishra et al. where a monolayer of a 2VP cylinder forming PS-*b*-2VP inside a  
7 graphoepitaxial trench displayed a lower degree of alignment within a trench compared to  
8 a bilayer. The authors explain that it is most likely because a bilayer film is closer to the  
9 bulk ODT of the BCP, whereas a monolayer exhibits a depression in ODT.[1, 2].

10

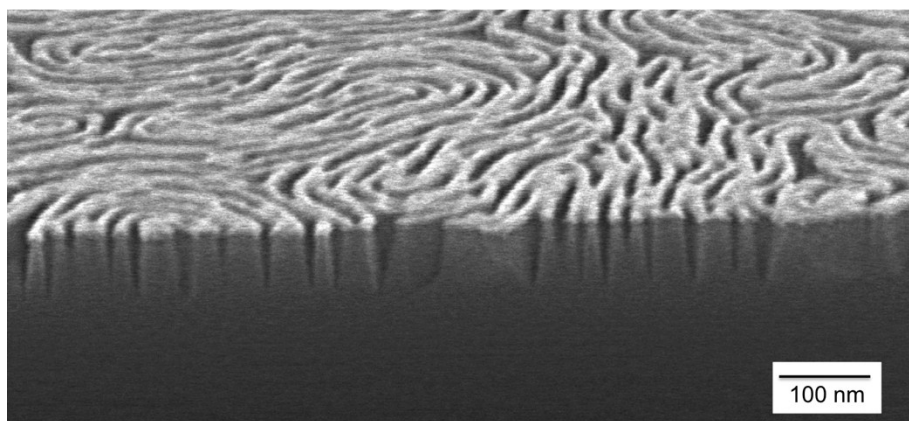

11

12 Figure S3. Low magnification SEM image of 11.9K-3.0K pattern transferred film.

13

14

15

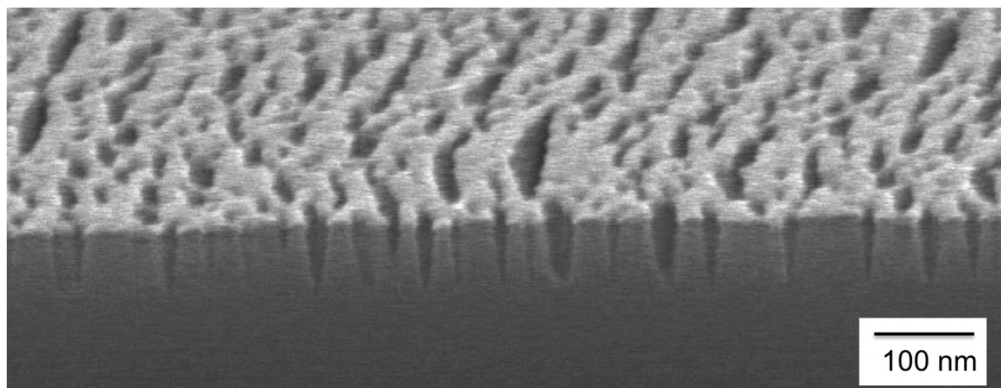

1  
2 Figure S4. Low magnification SEM image of 6.1K-1.6K pattern transferred film.

3

4

5

6 References:

7

8 [1] Hammond M R, Cochran E, Fredrickson G H and Kramer E J 2005 Temperature  
9 dependence of order, disorder, and defects in laterally confined diblock copolymer  
10 cylinder monolayers *Macromolecules* **38** 6575-85

11 [2] Mishra V, Fredrickson G H and Kramer E J 2012 Effect of film thickness and domain  
12 spacing on defect densities in directed self-assembly of cylindrical morphology block  
13 copolymers *ACS Nano* **6** 2629-41

14
